# Supplementary material for: Primary and secondary aerosols in Beijing in winter: sources, variations andprocesses
Source: Copernicus journal article supplement (doi:10.5194/acp-16-8309-2016), 2016-07-11
Supplement: Supplementary file 1 [file acp-16-8309-2016-supplement.pdf]

Supplement of Atmos. Chem. Phys., 16, 8309–8329, 2016  
<http://www.atmos-chem-phys.net/16/8309/2016/>  
doi:10.5194/acp-16-8309-2016-supplement  
© Author(s) 2016. CC Attribution 3.0 License.

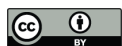

Atmospheric  
Chemistry  
and Physics  
Open Access  
EGU

*Supplement of*

## **Primary and secondary aerosols in Beijing in winter: sources, variations and processes**

**Yele Sun et al.**

*Correspondence to:* Yele Sun (sunyele@mail.iap.ac.cn)

The copyright of individual parts of the supplement might differ from the CC-BY 3.0 licence.

Table S1. A summary of non-refractory submicron aerosol composition and OA factors from AMS measurements in Beijing China.

| Site               | <sup>1</sup> CAMS | <sup>2</sup> PEK      | <sup>3</sup> PEK      | <sup>4</sup> PEK      | <sup>5</sup> IAP      | <sup>6</sup> IAP | <sup>6</sup> IAP | <sup>7</sup> IAP | <sup>8</sup> IAP           | <sup>9</sup> IAP    | <sup>10</sup> IAP     |
|--------------------|-------------------|-----------------------|-----------------------|-----------------------|-----------------------|------------------|------------------|------------------|----------------------------|---------------------|-----------------------|
| AMS                | Q-AMS             | HR-AMS                | HR-AMS                | ACSM                  | ACSM                  | HR-AMS           | HR-AMS           | HR-AMS           | HR-AMS                     | HR-AMS              | HR-AMS                |
| Season             | Summer            | Summer/Autumn         | Winter                | Summer                | Winter                | Summer           | Fall             | Winter           | Winter                     | Winter              | Fall                  |
| Date               | 9 - 21 Jul, 2006  | 24 Jul - 20 Sep, 2008 | 22 Nov - 22 Dec, 2010 | 26 Jun - 28 Aug, 2011 | 21 Nov - 20 Jan, 2012 | 1 - 31 Aug, 2012 | 1- 31 Oct, 2012  | 1 - 31 Jan, 2013 | 16 Dec, 2013- 17 Jan, 2014 | 1 Jan - 3 Feb, 2014 | 14 Oct - 12 Nov, 2014 |
| Index              | S, 2006           | S-F, 2008             | W, 2010               | S, 2011               | W, 2011-2012          | S, 2012          | F, 2012          | W, 2013          | W, 2013-2014               | W, 2014             | F, 2014               |
| Organics           | 28.1              | 23.9                  | 34.5                  | 20.0                  | 34.4                  |                  |                  | 49.1             | 38.1                       | 27.3                | 29.4                  |
| Sulfate            | 20.3              | 16.8                  | 8.7                   | 9.0                   | 9.3                   |                  |                  | 19.6             | 9.4                        | 8.6                 | 9.1                   |
| Nitrate            | 17.3              | 10.0                  | 6.8                   | 12.4                  | 10.9                  |                  |                  | 12.5             | 7.2                        | 8.1                 | 17.8                  |
| Ammonium           | 13.1              | 10.0                  | 7.7                   | 8.0                   | 8.6                   |                  |                  | 8.9              | 5.4                        | 4.5                 | 7.8                   |
| Chloride           | 1.1               | 0.6                   | 5.8                   | 0.5                   | 3.5                   |                  |                  | 3.6              | 4.0                        | 2.0                 | 2.9                   |
| NR-PM <sub>1</sub> | 80                | 61                    | 64                    | 50                    | 67                    |                  |                  | 94               | 64                         | 51                  | 67                    |
| HOA                | 11.5              | 4.3                   | 4.7                   | 7.1                   | 5.8                   | 2.9              | 3.0              | 5.4              | 3.9                        | 4.4                 | 3.4                   |
| COA                |                   | 5.8                   | 6.7                   |                       | 6.6                   | 3.0              | 7.8              | 9.8              | 6.7                        | 3.8                 | 7.5                   |
| CCOA               |                   |                       | 8.2                   |                       | 11.3                  |                  |                  | 9.3              | 7.6                        | 4.6                 |                       |
| BBOA               |                   |                       | 4.1                   |                       |                       |                  |                  |                  | 3.3                        |                     | 4.1                   |
| OOA                |                   |                       |                       | 12.7                  | 10.7                  | 7.2              |                  |                  |                            |                     |                       |
| SV-OOA             | 4.3               | 5.7                   | 4.3                   |                       |                       |                  | 6.3              | 12.8             | 12.1                       | 9.8                 | 7.0                   |
| LV-OOA             | 12.3              | 8.1                   | 6.2                   |                       |                       |                  | 10.2             | 13.8             | 4.4                        | 4.1                 | 7.9                   |
| OA                 | 28                | 24                    | 35                    | 20                    | 34                    | 13               | 27               | 51               | 38                         | 27                  | 30                    |

Sampling sites: Chinese Academy of Meteorological Sciences (CAMS); Peking University (PEK); Institute of Atmospheric Physics (IAP).

References: <sup>1</sup>(Sun et al., 2010); <sup>2</sup>(Huang et al., 2010); <sup>3</sup>(Hu et al., 2016); <sup>4</sup>(Sun et al., 2012); <sup>5</sup>(Sun et al., 2013); <sup>6</sup>(Zhang et al., 2015a); <sup>7</sup>(Zhang et al., 2014); <sup>8</sup>This study; <sup>9</sup>(Zhang et al., 2015b); <sup>10</sup>(Xu et al., 2015).

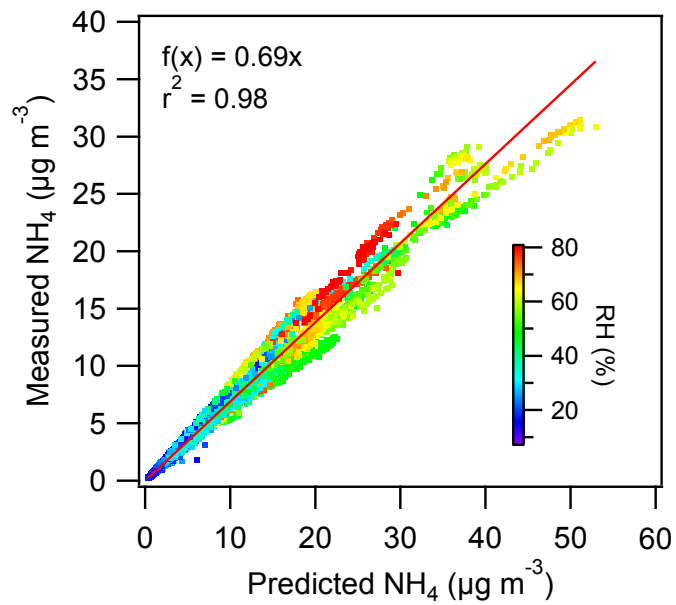

Figure S1. Correlation between measured  $\text{NH}_4^+$  and predicted  $\text{NH}_4^+$  ( $=18 \times (2 \times \text{SO}_4^{2-}/96 + \text{NO}_3^-/62 + \text{Cl}/35.5)$ ).

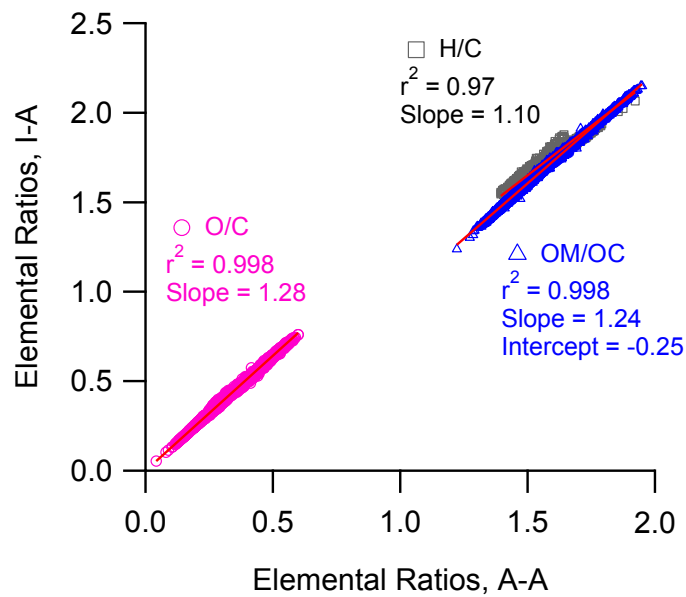

Figure S2. Comparison of the elemental ratios calculated from the A-A method (Aiken et al., 2008) with those from the recently updated I-A method (Canagaratna et al., 2015).

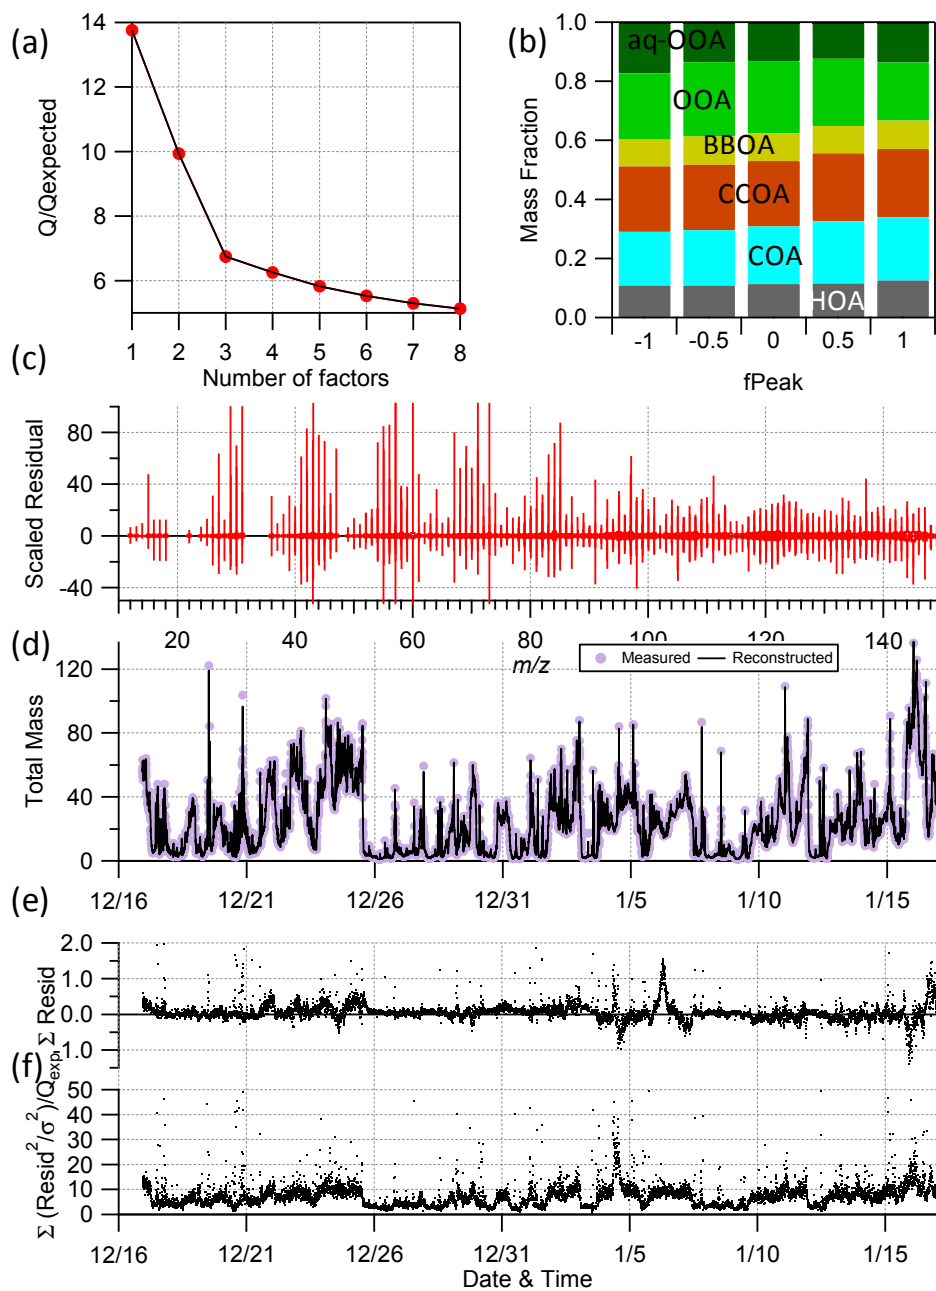

Figure S3. A summary of PMF diagnostic plot: (a)  $Q/Q_{\text{exp}}$  as a function of number of factors, (b) mass fractions of OA factors as a function of  $f_{\text{peak}}$ , (c) scaled residual for each fragment ion, (d) a comparison of measured and PMF reconstructed mass, (e) time series of residual, and (f) time series of  $Q/Q_{\text{exp}}$ .

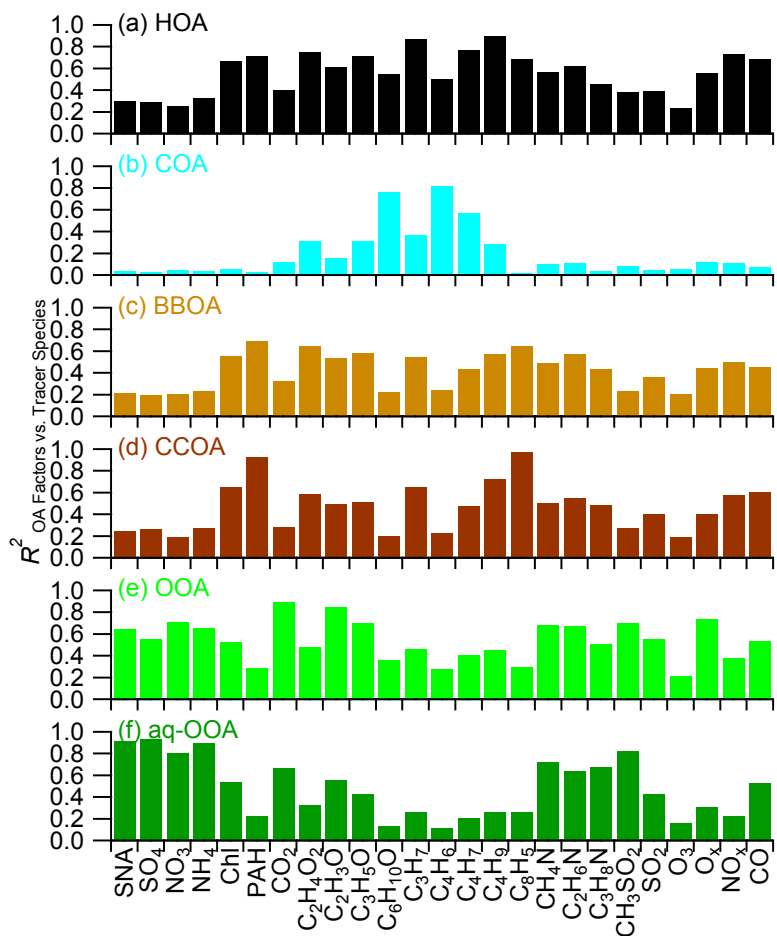

Figure S4. Correlations of six OA factors with other tracers.

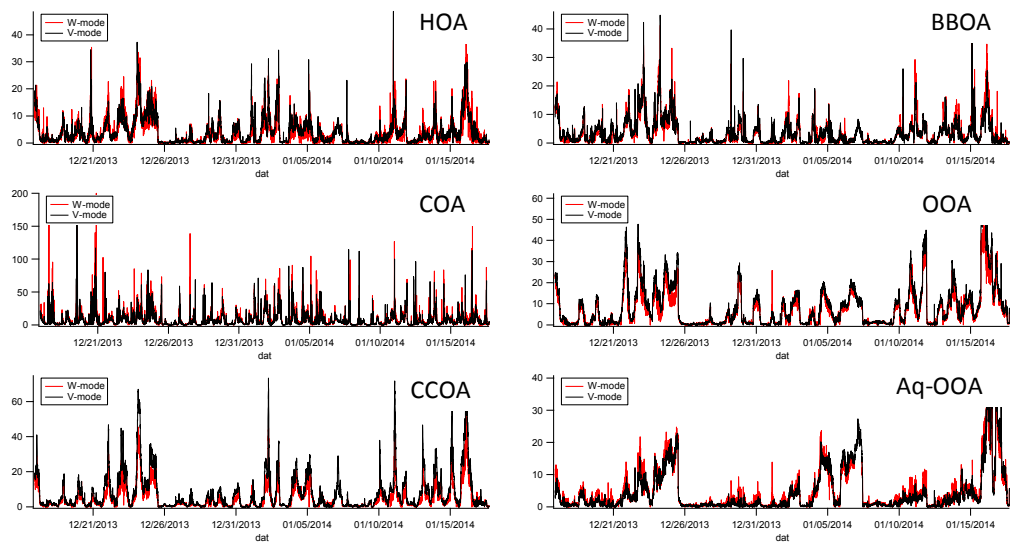

Figure S5. Comparisons of time series of six OA factors from PMF analysis of V-mode and W-mode.

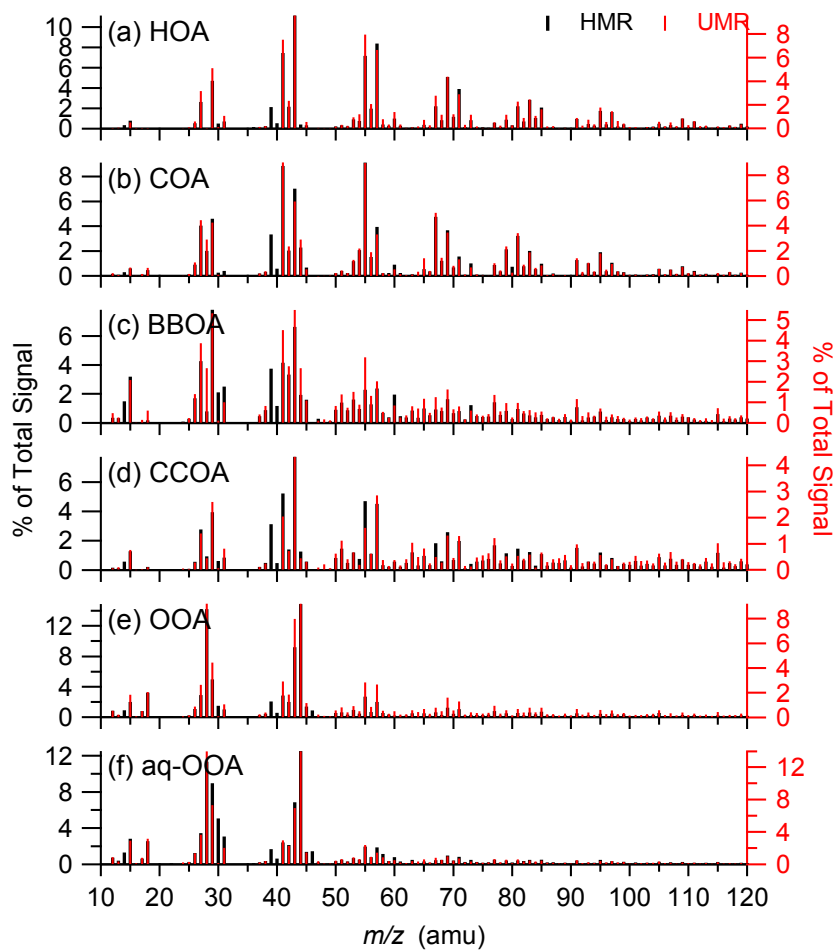

Figure 6. Mass spectra comparisons between UMR-PMF and HMR-PMF.

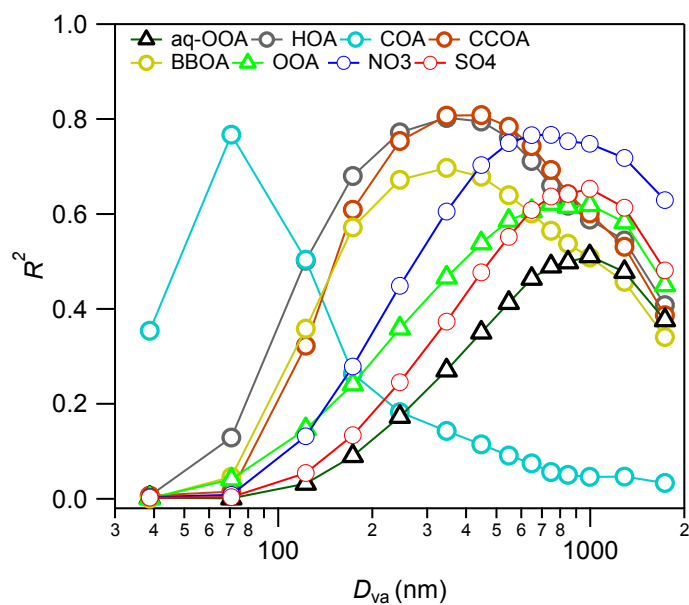

Figure S7. Correlations of organics at different sizes with six OA factors, sulfate and nitrate.

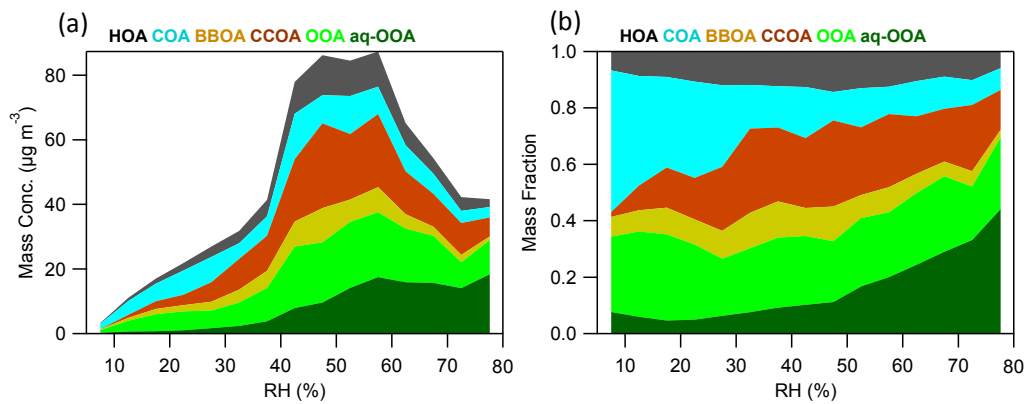

Figure S8. Variations of (a) mass concentrations and (b) mass fractions of OA factors as a function of RH.

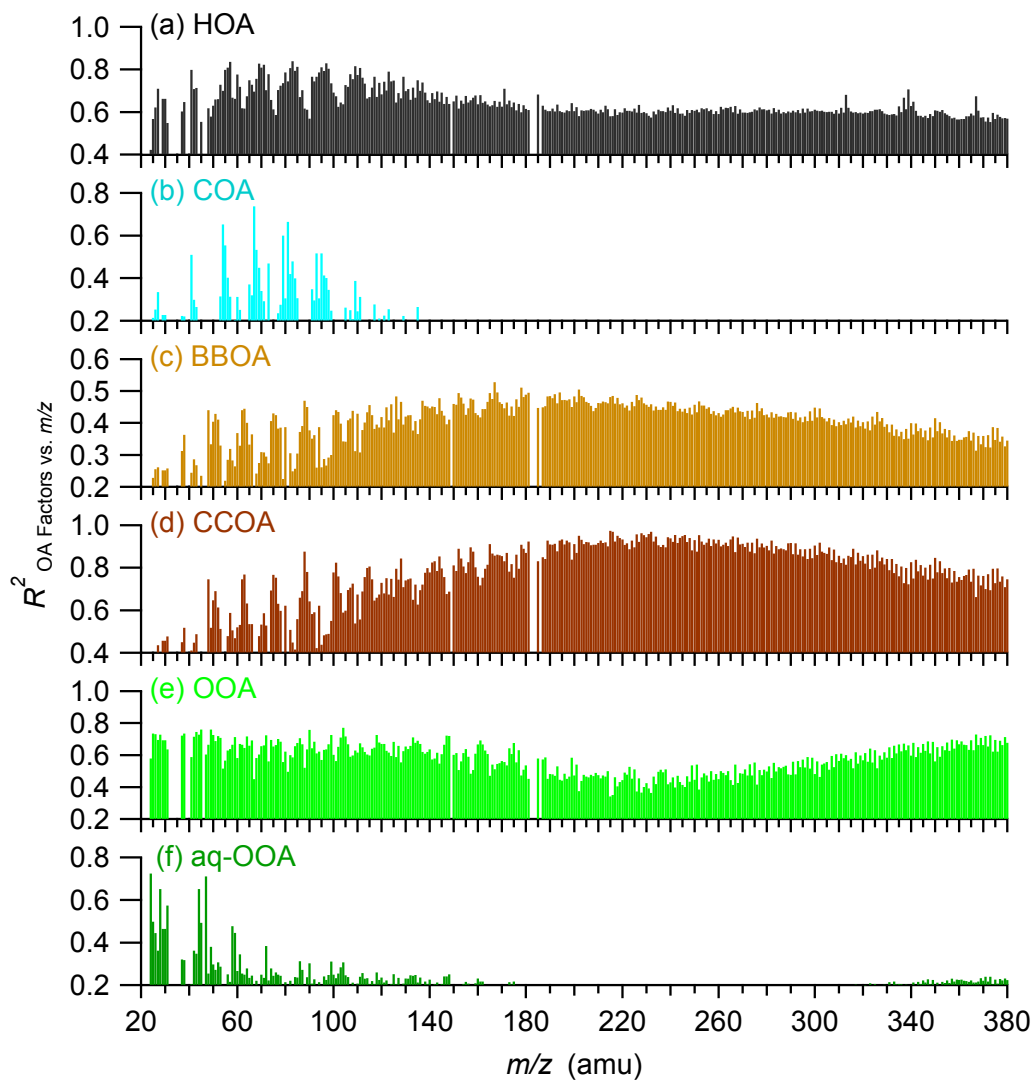

Figure S9. Correlations of six OA factors with each unit  $m/z$ .



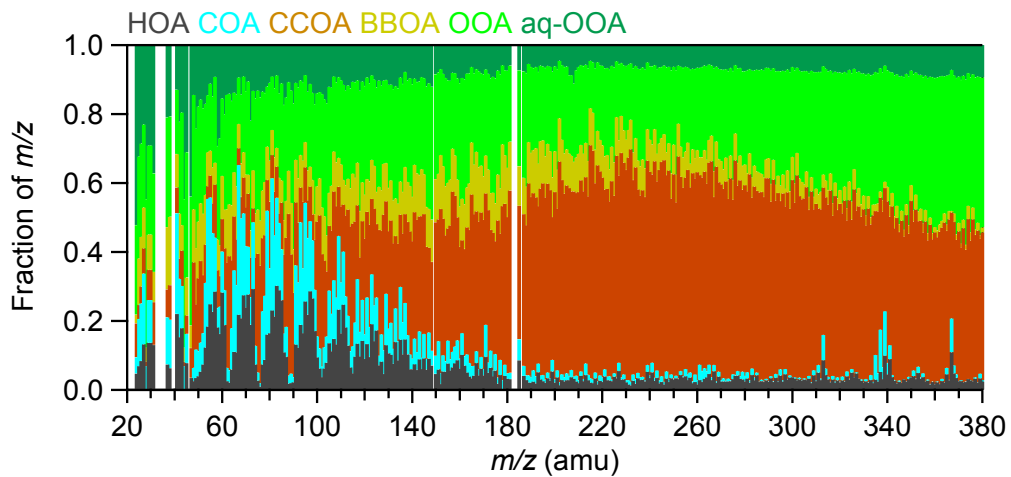

Figure S10. Contributions of six OA factors to each  $m/z$ .

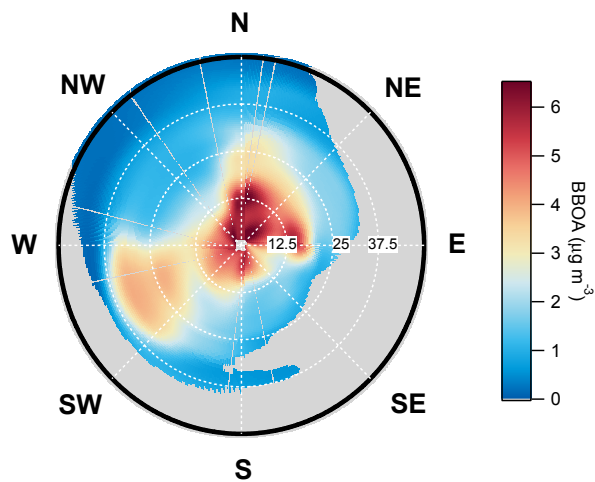

Figure S11. Bivariate polar plot of BBOA.

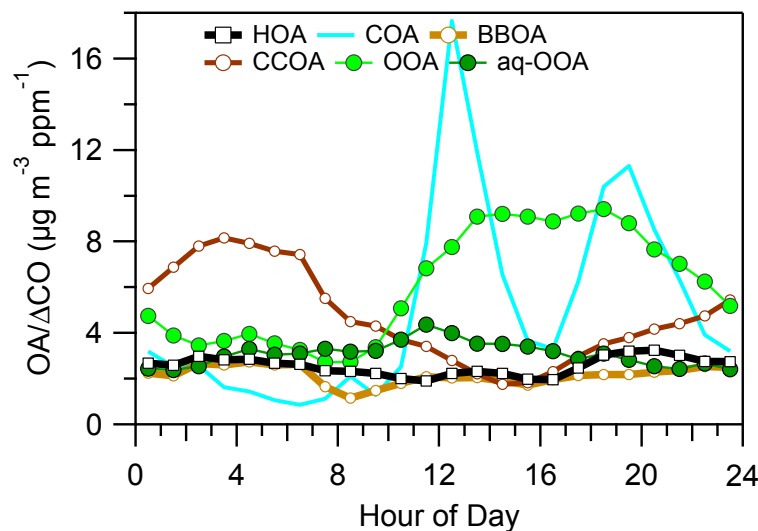

Figure S12. Average diurnal cycles of OA/CO for six OA factors.

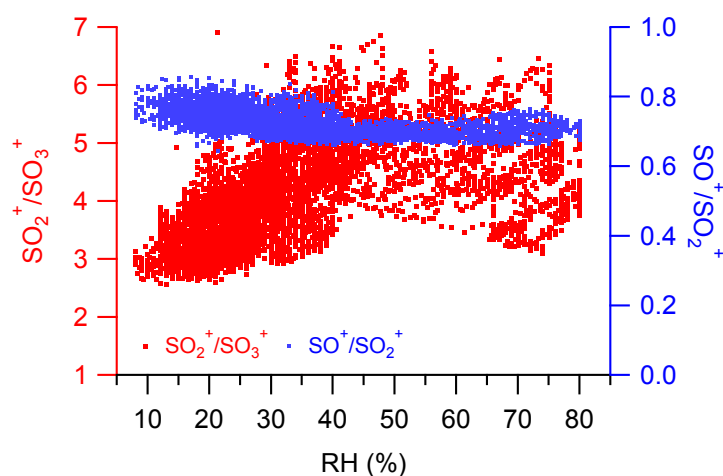

Figure S13. Variations of  $\text{SO}_2^+/\text{SO}_3^+$  and  $\text{SO}^+/\text{SO}_2^+$  ratios as a function of RH.

#### References:

- Aiken, A. C., DeCarlo, P. F., Kroll, J. H., Worsnop, D. R., Huffman, J. A., Docherty, K. S., Ulbrich, I. M., Mohr, C., Kimmel, J. R., Sueper, D., Sun, Y., Zhang, Q., Trimborn, A., Northway, M., Ziemann, P. J., Canagaratna, M. R., Onasch, T. B., Alfarra, M. R., Prevot, A. S. H., Dommen, J., Duplissy, J., Metzger, A., Baltensperger, U., and Jimenez, J. L.: O/C and OM/OC ratios of primary, secondary, and ambient organic aerosols with High-Resolution Time-of-Flight Aerosol Mass Spectrometry, *Environ. Sci. Technol.*, 42, 4478-4485, 2008.
- Canagaratna, M. R., Jimenez, J. L., Kroll, J. H., Chen, Q., Kessler, S. H., Massoli, P., Hildebrandt Ruiz, L., Fortner, E., Williams, L. R., Wilson, K. R., Surratt, J. D., Donahue, N. M., Jayne, J. T., and Worsnop, D. R.: Elemental ratio measurements of organic compounds using

- aerosol mass spectrometry: characterization, improved calibration, and implications, *Atmos. Chem. Phys.*, 15, 253-272, 10.5194/acp-15-253-2015, 2015.
- Hu, W., Hu, M., Hu, W., Jimenez, J. L., Yuan, B., Chen, W., Wang, M., Wu, Y., Chen, C., Wang, Z., Peng, J., Zeng, L., and Shao, M.: Chemical composition, sources and aging process of sub-micron aerosols in Beijing: contrast between summer and winter, *Journal of Geophysical Research: Atmospheres*, 121, n/a-n/a, 10.1002/2015JD024020, 2016.
- Huang, X. F., He, L. Y., Hu, M., Canagaratna, M. R., Sun, Y., Zhang, Q., Zhu, T., Xue, L., Zeng, L. W., Liu, X. G., Zhang, Y. H., Jayne, J. T., Ng, N. L., and Worsnop, D. R.: Highly time-resolved chemical characterization of atmospheric submicron particles during 2008 Beijing Olympic Games using an Aerodyne High-Resolution Aerosol Mass Spectrometer, *Atmos. Chem. Phys.*, 10, 8933-8945, 10.5194/acp-10-8933-2010, 2010.
- Sun, J., Zhang, Q., Canagaratna, M. R., Zhang, Y., Ng, N. L., Sun, Y., Jayne, J. T., Zhang, X., Zhang, X., and Worsnop, D. R.: Highly time- and size-resolved characterization of submicron aerosol particles in Beijing using an Aerodyne Aerosol Mass Spectrometer, *Atmos. Environ.*, 44, 131-140, 2010.
- Sun, Y. L., Wang, Z., Dong, H., Yang, T., Li, J., Pan, X., Chen, P., and Jayne, J. T.: Characterization of summer organic and inorganic aerosols in Beijing, China with an Aerosol Chemical Speciation Monitor, *Atmos. Environ.*, 51, 250-259, 10.1016/j.atmosenv.2012.01.013, 2012.
- Sun, Y. L., Wang, Z. F., Fu, P. Q., Yang, T., Jiang, Q., Dong, H. B., Li, J., and Jia, J. J.: Aerosol composition, sources and processes during wintertime in Beijing, China, *Atmos. Chem. Phys.*, 13, 4577-4592, 10.5194/acp-13-4577-2013, 2013.
- Xu, W. Q., Sun, Y. L., Chen, C., Du, W., Han, T. T., Wang, Q. Q., Fu, P. Q., Wang, Z. F., Zhao, X. J., Zhou, L. B., Ji, D. S., Wang, P. C., and Worsnop, D. R.: Aerosol composition, oxidation properties, and sources in Beijing: results from the 2014 Asia-Pacific Economic Cooperation summit study, *Atmos. Chem. Phys.*, 15, 13681-13698, 10.5194/acp-15-13681-2015, 2015.
- Zhang, J., Wang, Y., Huang, X., Liu, Z., Ji, D., and Sun, Y.: Characterization of organic aerosols in Beijing using an aerodyne high-resolution aerosol mass spectrometer, *Advances in Atmospheric Sciences*, 32, 877-888, 10.1007/s00376-014-4153-9, 2015a.
- Zhang, J. K., Sun, Y., Liu, Z. R., Ji, D. S., Hu, B., Liu, Q., and Wang, Y. S.: Characterization of submicron aerosols during a month of serious pollution in Beijing, 2013, *Atmos. Chem. Phys.*, 14, 2887-2903, 10.5194/acp-14-2887-2014, 2014.
- Zhang, J. K., Ji, D. S., Liu, Z. R., Hu, B., Wang, L. L., Huang, X. J., and Wang, Y. S.: New characteristics of submicron aerosols and factor analysis of combined organic and inorganic aerosol mass spectra during winter in Beijing, *Atmos. Chem. Phys. Discuss.*, 15, 18537-18576, 10.5194/acpd-15-18537-2015, 2015b.
